# Supplementary material
Source: publisher figshare collection journal article supplement (https://acs.figshare.com/ndownloader/files/4415371)
Supplement: Supplementary file 1 [file 4415371]

## **Supporting Information**

### **Synthesis and antiproliferative evaluation of certain indeno[1,2-c]quinoline derivatives. Part 2**

**Chih-Hua Tseng,<sup>a</sup> Cherng-Chyi Tzeng,<sup>a</sup> Chiao-Li Yang,<sup>a</sup> Pei-Jung Lu,<sup>b</sup> Hui-Ling Chen,<sup>b</sup>  
Hao-Yi Li,<sup>c</sup> You-Chung Chuang,<sup>c</sup> Chia-Ning Yang,<sup>\*,c</sup> and Yeh-Long Chen,<sup>\*,a</sup>**

<sup>a</sup>*Department of Medicinal and Applied Chemistry, College of Life Science, Kaohsiung Medical University, Kaohsiung City 807, Taiwan*

<sup>b</sup>*Institute of Clinical Medicine, National Cheng-Kung University, School of Medicine, 138 Sheng-Li Road, Tainan 704, Taiwan*

<sup>c</sup>*Institute of Biotechnology, National University of Kaohsiung, 700 Kaohsiung University Rd, Kaohsiung, Taiwan.*

#### **Contents:**

S1: Title Page

S2: Detailed parameters of **5a** was determined by the X-ray crystallography

**Detailed parameters of 5a was determined by the X-ray crystallography.**

Compound **5a** was unambiguously confirmed by its X-ray structural analysis. The structure was solved and refined by direct methods Shelx 97<sup>ref</sup> suite of programs. Red single crystal (0.25 x 0.20 x 0.15 mm<sup>3</sup>) of **5a** was obtained by slow evaporation from ethanol/CH<sub>2</sub>Cl<sub>2</sub> (30/70) solution: monoclinic, space group P 2(1)/n,  $a = 14.5476(3) \text{ \AA}$ ,  $b = 8.4212(2) \text{ \AA}$ ,  $c = 14.9701(3) \text{ \AA}$ ,  $\alpha = 90.00^\circ$ ,  $\beta = 103.7400(10)^\circ$ ,  $\gamma = 90.00^\circ$ ,  $V = 1781.48(7) \text{ \AA}^3$ ,  $Z = 4$ ,  $\delta$  (calcd) = 1.295 Mg.m<sup>-3</sup>, FW = 347.41 for C<sub>21</sub>H<sub>21</sub>N<sub>3</sub>O<sub>2</sub>,  $F(000) = 736$ . Complete crystallographic data for the structural analysis have been deposited with the Cambridge Crystallographic Data Centre, CCDC no.760627 for compound **5a**. Copies of this information may be obtained free of charge from the Director, Cambridge Crystallographic Data Centre, 12 Union Road, Cambridge, CB2 1EZ, UK. (fax: +44-1223-336033, e-mail: [deposit@ccdc.cam.ac.uk](mailto:deposit@ccdc.cam.ac.uk) or via [www.ccdc.cam.ac.uk](http://www.ccdc.cam.ac.uk)).

(Ref: Sheldrick, G. M., SHELXS 97, Program Crystal Structure Solution, **1997**, University of Göttingen, Germany.)
